# Supplementary material
Source: PubMed Central journal article supplement (PMC6340295)
Supplement: NIHMS1001487-supplement-SI.pdf [file NIHMS1001487-supplement-SI.pdf]

## Supporting Information

### Fixed-charge Trimethyl Pyrilium Modification Enables Enhanced Top-down Mass Spectrometry Sequencing of Intact Protein Complexes

Daniel A. Polasky<sup>†</sup>, Frederik Lermyte<sup>#</sup>, Michael Nshanian<sup>‡</sup>, Frank Sobott<sup>#°+</sup>, Phillip C. Andrews<sup>‡</sup>, Joseph A. Loo<sup>‡,§</sup>, and Brandon T. Ruotolo<sup>†\*</sup>

<sup>†</sup> Department of Chemistry, University of Michigan, 930 N. University Ave, Ann Arbor, MI 48109

<sup>‡</sup> Department of Chemistry and Biochemistry, University of California Los Angeles, Los Angeles, CA 90095

<sup>‡</sup> Department of Biological Chemistry, University of Michigan, 1150 W. Medical Center Dr., Ann Arbor MI, 48109

<sup>§</sup> Department of Biological Chemistry, David Geffen School of Medicine, and UCLA/DOE Institute for Genomics and Proteomics, University of California Los Angeles, Los Angeles, CA 90095

<sup>#</sup> Department of Chemistry, University of Antwerp, Groenenborgerlaan 171, 2020 Antwerp, Belgium

<sup>°</sup> The Astbury Centre for Structural Molecular Biology, University of Leeds, Leeds, LS2 9JT, UK

<sup>+</sup> School of Molecular and Cellular Biology, University of Leeds, Leeds, LS2 9JT, UK

#### Corresponding Author:

[bruotolo@umich.edu](mailto:bruotolo@umich.edu)

Phone: +1-734-615-0198

Fax: +1 -734-615-0198

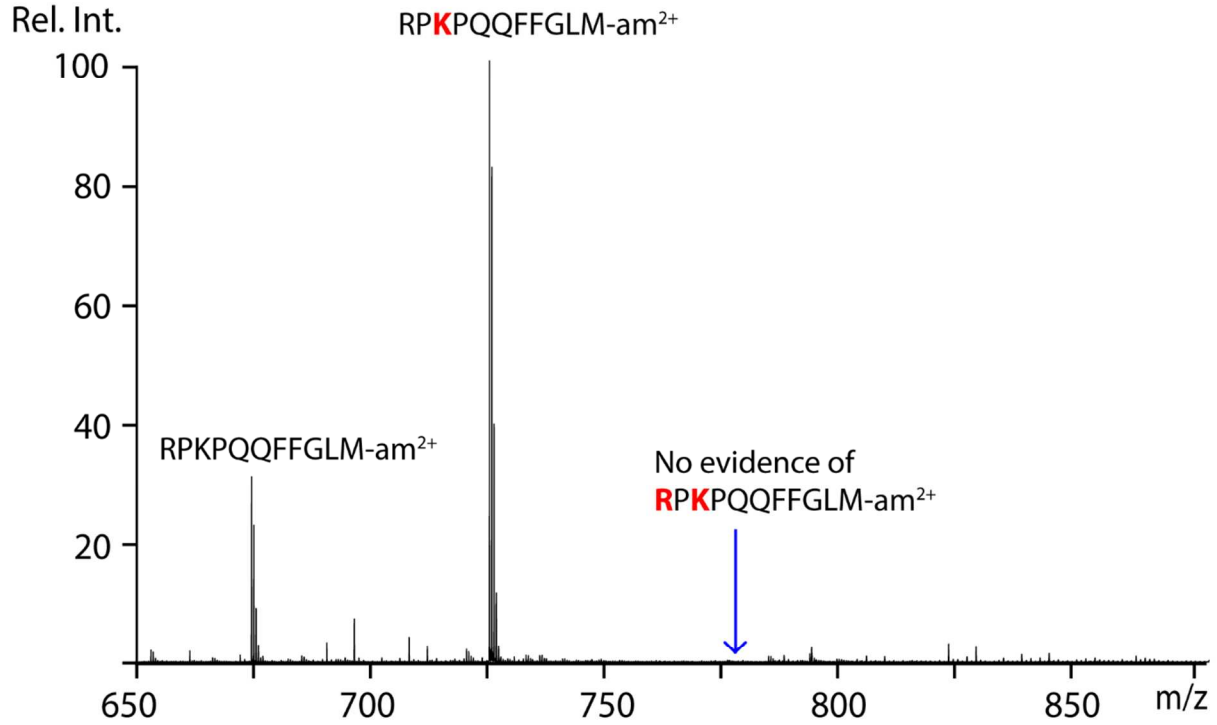

**Figure S1:** TMP modification of Substance P peptide (RPKPQQFFGLM-amide). Modification was performed under the same conditions as for proteins (see experimental), with TMP to Lysine molar ratio adjusted accordingly. The majority of the Substance P is modified at Lysine (red highlighted, center), but a significant minority remains unmodified after 24 hours. No evidence of modification at the n-terminal Arginine is observed, despite the availability of a primary amine at the terminus. No evidence of any other side reactions is observed.

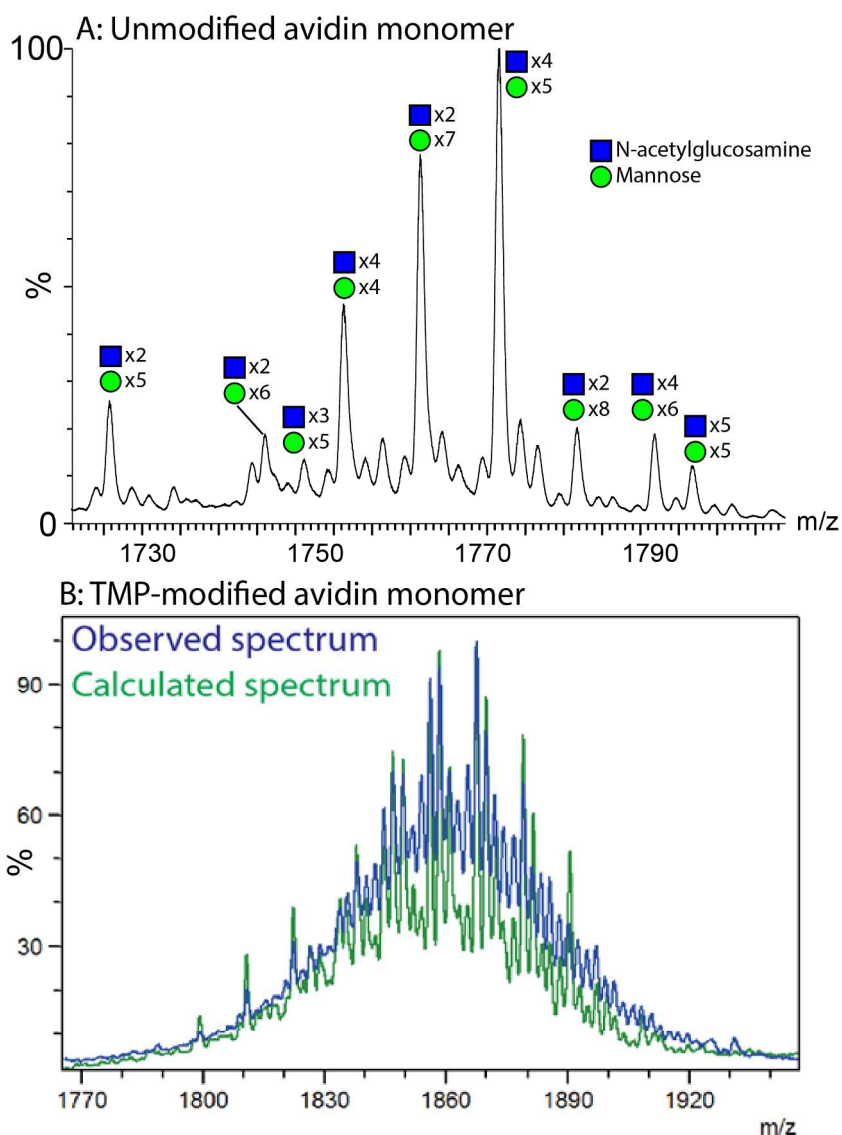

**Figure S2:** A) Mass spectrum of a monomer of unmodified avidin, displaying the heterogeneity of its glycosylation. This heterogeneity, combined with some variation in the number of TMP modifications observed on various monomers results in the spectrum shown in B. B) Modeled (calculated, green) and experimentally observed (blue) mass spectra for TMP-modified avidin monomer. The model was obtained by sequentially adding the  $m/z$  of a TMP modification to the spectrum of an unmodified avidin monomer to generate predicted spectra for each possible number of TMP modifications considered (0 to 15). A linear system of equations representing each possible modification state was solved for the optimal distribution of intensity (i.e. how much intensity in each modification state best recapitulates the observed mass spectrum) using the partial conjugate gradient method, resulting in the bar graph in Figure S2 and the calculated spectrum above. The major peaks in the observed spectrum are well represented in the calculated spectrum, though there is some discrepancy in the intensities. This is likely due to differences in peak width due to increased adduction in the TMP-modified data, a distinction which is not of great importance for this simple estimation of modification efficiency.

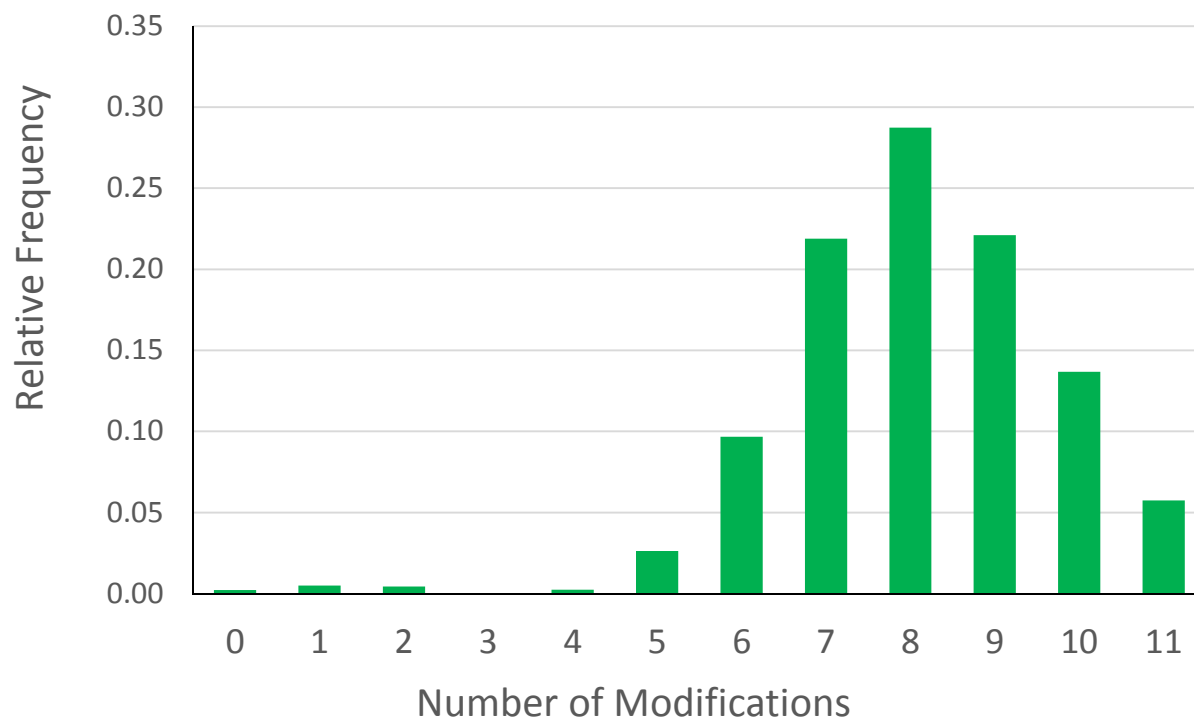

**Figure S3:** Number of TMP modifications to a single avidin monomer from model analysis described in Figure S1. There are 10 canonical sites (primary amines) available for modification in the form of nine lysine residues and the N-terminus, as well as at least one site on the glycosylated side chain of Asn-17 available for TMP modification. Data indicates generally good incorporation of the TMP tag with some variability in the final number of modifications. Achieving complete incorporation of tags is highly challenging in native, folded protein complexes as not all reaction sites are exposed to solvent, likely the primary cause of the distribution of modification states observed here. Aside from the glycan, no side reactions are observed with any non-Lysine amino acid residues.

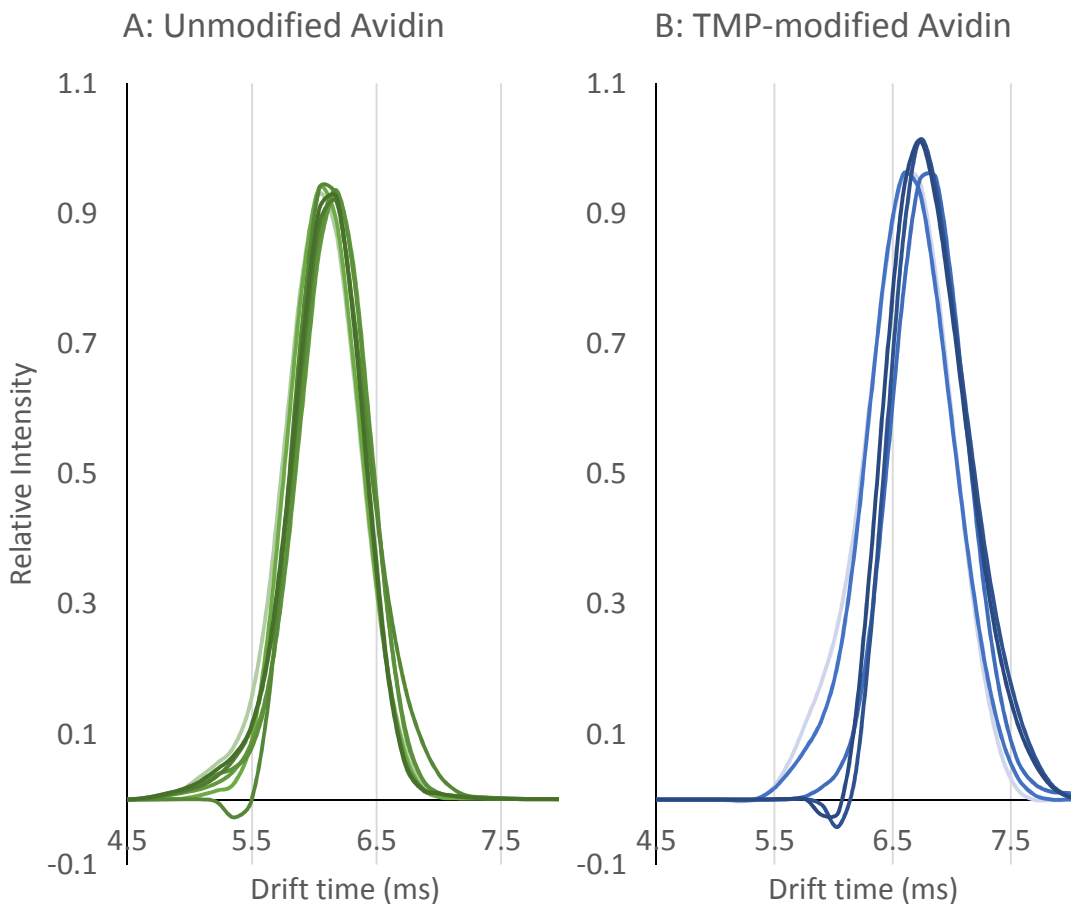

**Figure S4:** Ion mobility arrival time distributions of replicate analyses of the  $17^+$  charge state of A) the unmodified (green lines,  $m/z$  3750) and B) TMP-modified (blue lines,  $m/z$  3960) avidin tetramer with no excess collisional activation energy. Both unmodified and TMP-modified distributions display a single peak, generally indicating the presence of a single, native-like global structure. The measured mass of unmodified Avidin tetramer was 63.9 kDa, while the measured mass of the TMP-modified Avidin was 67.5 kDa, with variation of approx.  $\pm 0.5$  kDa between labeling reactions. The average centroid drift time for unmodified Avidin was 6.2 ms and the average for TMP-modified Avidin was 6.7 ms. The resulting 7% increase in drift time is in line with expectations from previous work in which Avidin was crosslinked with various reagents, resulting in 5-10% increases in CCS without perturbing structure<sup>1</sup>. We attribute the slight variations in drift time in TMP-modified Avidin to differences in final mass as a result of differences in labeling efficiency across several reaction trials.

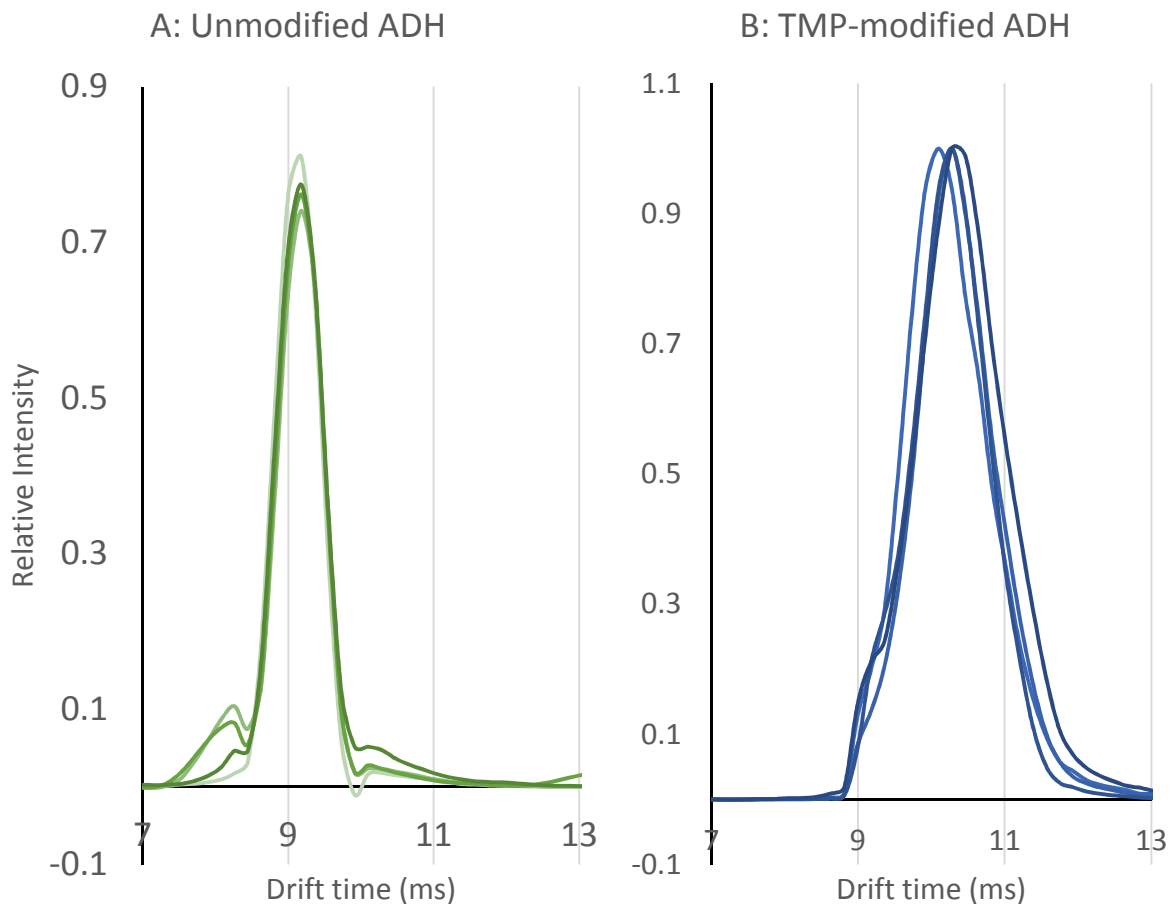

**Figure S5:** Ion mobility arrival time distributions of replicate analyses of the  $26^+$  charge state of the A) unmodified (green lines,  $m/z$  5675) and B) TMP-modified (blue lines,  $m/z$  6100) ADH tetramer with no collisional activation energy applied. Both unmodified and TMP-modified distributions display a single peak, generally indicating the presence of a single, native-like global structure. The measured mass of unmodified ADH tetramer was 147.8 kDa, while the measured mass of the TMP-modified ADH was 158.3 kDa, with variation of approx.  $\pm 1$  kDa between labeling reactions. The average centroid drift time for unmodified ADH was 9.2 ms and the average for TMP-modified ADH was 10.3 ms. The resulting 11% increase in drift time is in line with expectations from previous work in which several globular proteins were crosslinked with various reagents, resulting in 5-10% increases in CCS without perturbing structure<sup>1</sup>. We attribute the slight variations in centroid drift time and increased peak broadness in TMP-modified ADH to differences in final mass as a result of differences in labeling efficiency.

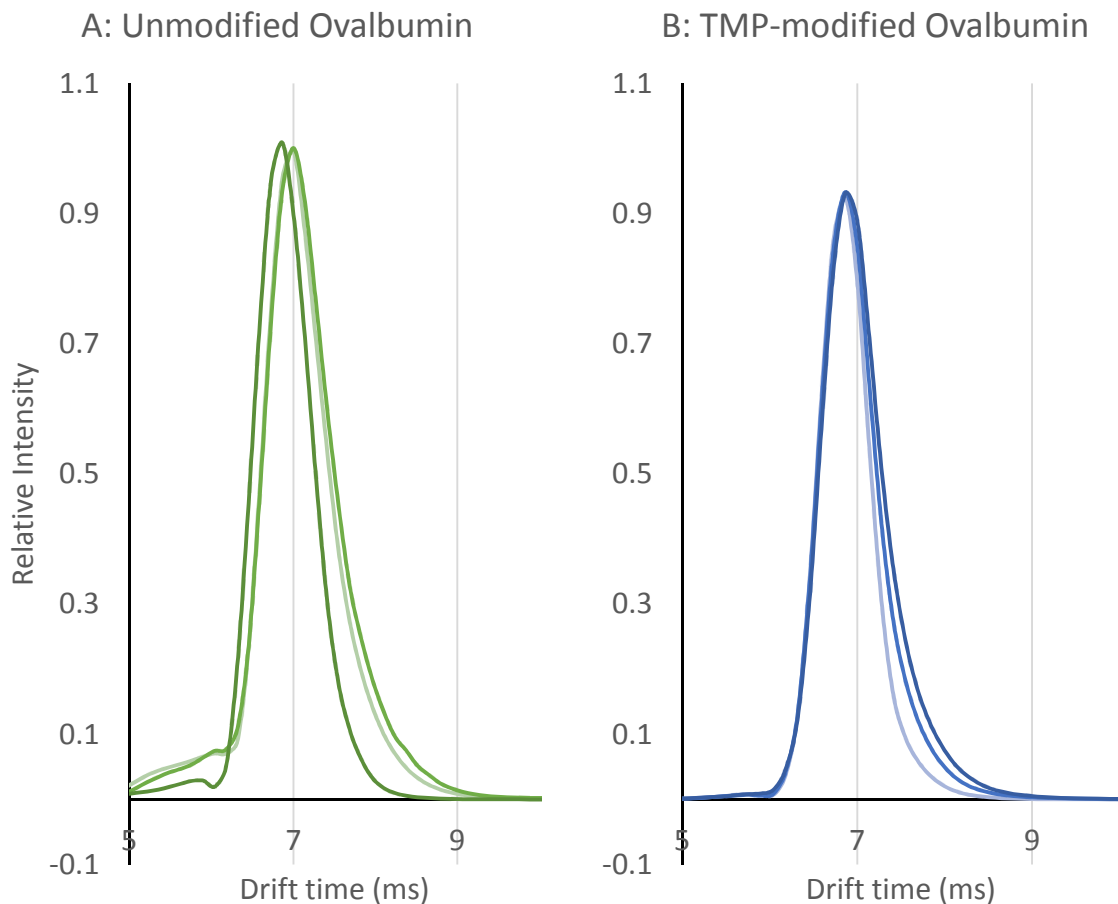

**Figure S6:** Ion mobility arrival time distributions of replicate analyses of the A) unmodified  $12^+$  (green lines,  $m/z$  3720) and B) TMP-modified  $13^+$  (blue lines,  $m/z$  3780) Ovalbumin monomer with no collisional activation energy applied. Note that different charge states were used for this analysis as the modified and unmodified charge state distributions were very narrow and did not share any high abundance peaks. Both unmodified and TMP-modified distributions display a single peak, generally indicating the presence of a single, native-like global structure. The measured mass of unmodified Ovalbumin monomer was 44.7 kDa, while the measured mass of the TMP-modified Ovalbumin monomer was 49.0 kDa, with variation of approx.  $\pm 0.5$  kDa between labeling reactions. The average centroid drift time for unmodified Ovalbumin was 6.9 ms and the average for TMP-modified Ovalbumin was 6.9 ms. As the TMP-modified Ovalbumin here is at a higher charge state than the unmodified, it will have a larger collision cross section value despite the similarity in drift time, but, as in the case of ADH and Avidin, the increase in cross section is on par with the 5-10% observed following labeling of protein complexes in previous work<sup>1</sup>.

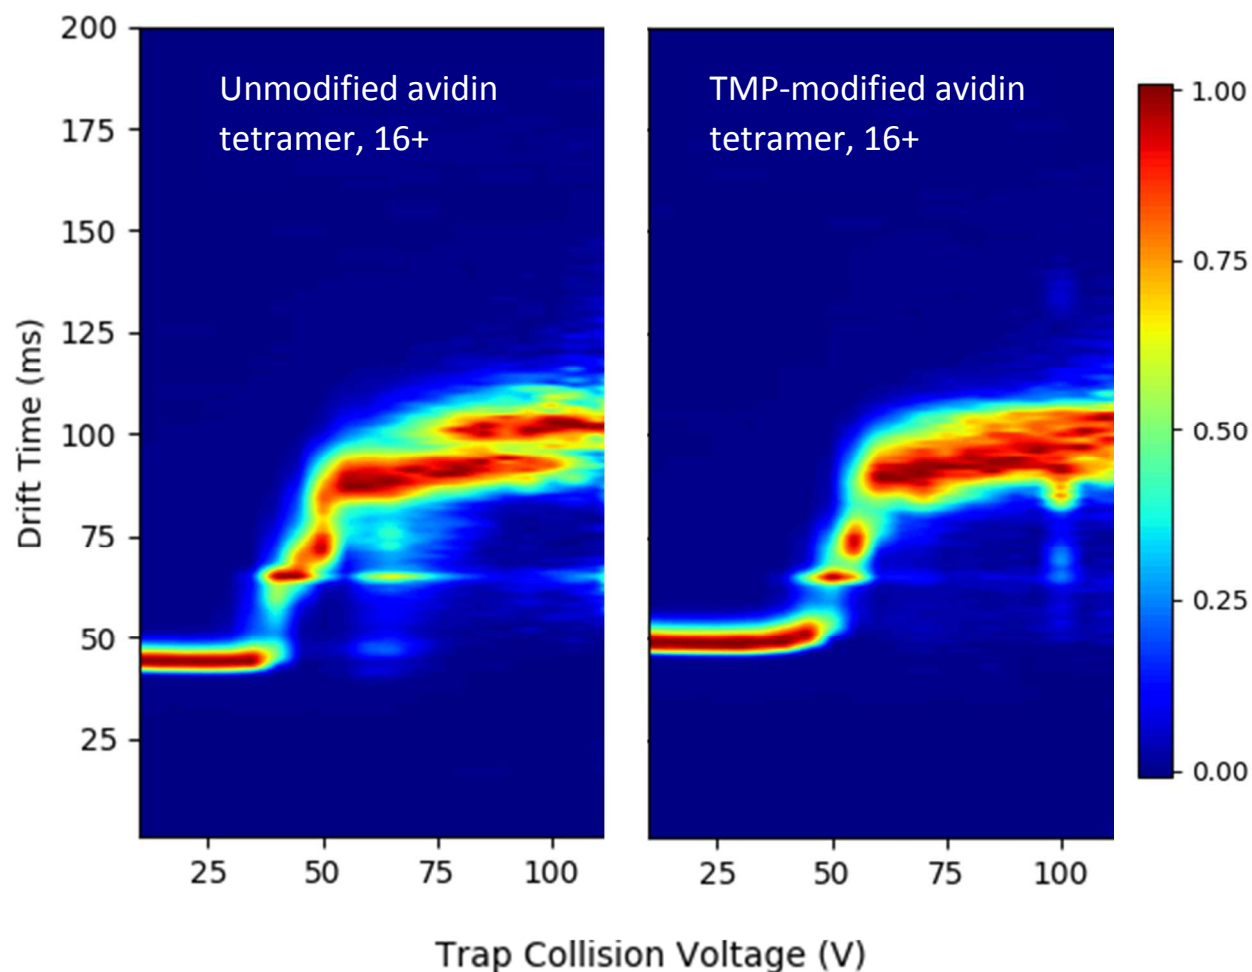

**Figure S7:** Collision induced unfolding (CIU) profiles of the same charge state of unmodified (left) and TMP-modified (right) avidin tetramer. The profiles show the increases in drift time (unfolding) as a function of applied collisional energy (trap collision voltage, x-axis). Notably, both modified and unmodified profiles show the same five features, albeit at slightly different intensities and onset voltages. This broad similarity is indicative of similar global structure (with slight changes possible to local structure), as we would expect following chemical modification with TMP. The similarity of the CIU profiles observed, combined with the same initial drift times (Figures S4-S6), indicates that TMP modification does not cause measurable structural changes in the protein complexes analyzed in this work.



**Table S1:** Table of fragment identifications for unmodified Avidin. Output of a representative single analysis of unmodified Avidin is presented. Information for the detected feature, including m/z, peak intensity, and charge is shown along with the identified match, including sequence, ion type, and error in parts per million (ppm). Data presented in the main body of the paper contain at least three replicates similar to the data presented here. Mass accuracy of identified features is consistent across all sequencing data presented.

| Observed m/z | Intensity | z | Calculated m/z | Error (ppm) | Sequence                                       | Ion Type | Neutral Losses |
|--------------|-----------|---|----------------|-------------|------------------------------------------------|----------|----------------|
| 386.2049     | 915.7     | 1 | 386.2034       | -4.0        | QKE                                            | y3       | H2O loss       |
| 505.2602     | 3383.0    | 1 | 505.2617       | 3.0         | TQKE                                           | y4       |                |
| 516.3020     | 2148.0    | 2 | 516.3014       | -1.0        | TRLRTQKE                                       | y8       |                |
| 644.7045     | 2104.0    | 3 | 644.7094       | 7.7         | TRVGINIFRLRTQKE                                | y16      |                |
| 661.3629     | 3832.8    | 1 | 661.3628       | -0.1        | RTQKE                                          | y5       |                |
| 668.3883     | 5143.9    | 3 | 668.3885       | 0.3         | ATRVGINIFRLRTQKE                               | y17      |                |
| 711.0826     | 3183.6    | 3 | 711.0868       | 6.0         | KATRVGINIFRLRTQKE                              | y18      |                |
| 767.1068     | 1295.3    | 3 | 767.1097       | 3.8         | WKATRVGINIFRLRTQKE                             | y19      | H2O loss       |
| 767.4377     | 7494.1    | 3 | 767.4377       | 0.0         | WKATRVGINIFRLRTQKE                             | y19      | NH3 loss       |
| 773.1131     | 321826.4  | 3 | 773.1132       | 0.2         | WKATRVGINIFRLRTQKE                             | y19      |                |
| 774.4467     | 7157.3    | 1 | 774.4468       | 0.2         | LRTQKE                                         | y6       |                |
| 805.7860     | 3798.8    | 3 | 805.7800       | -7.4        | DWKATRVGINIFRLRTQKE                            | y20      | NH3 loss       |
| 837.9861     | 6951.2    | 2 | 837.9861       | 0.0         | VGINIFRLRTQKE                                  | y14      |                |
| 844.1247     | 2611.8    | 3 | 844.1223       | -2.8        | DDWKATRVGINIFRLRTQKE                           | y21      | NH3 loss       |
| 868.7997     | 1850.1    | 3 | 868.8050       | 6.1         | GDDWKATRVGINIFRLRTQKE                          | y22      |                |
| 900.8284     | 2272.7    | 3 | 900.8242       | -4.7        | IGDDWKATRVGINIFRLRTQKE                         | y23      | NH3 loss       |
| 906.4998     | 40845.2   | 3 | 906.4997       | -0.1        | IGDDWKATRVGINIFRLRTQKE                         | y23      |                |
| 906.4998     | 49389.6   | 3 | 906.4997       | -0.1        | IGDDWKATRVGINIFRLRTQKE                         | y23      |                |
| 930.5480     | 1790.7    | 1 | 930.5479       | -0.1        | RLRTQKE                                        | y7       |                |
| 944.8361     | 1916.7    | 3 | 944.8420       | 6.2         | DIGDDWKATRVGINIFRLRTQKE                        | y24      |                |
| 958.0516     | 2846.4    | 2 | 958.0472       | -4.5        | TRVGINIFRLRTQKE                                | y16      | NH3 loss       |
| 977.1882     | 1571.2    | 3 | 977.1808       | -7.6        | NDIGDDWKATRVGINIFRLRTQKE                       | y25      | NH3 loss       |
| 982.8569     | 2636.1    | 3 | 982.8563       | -0.6        | NDIGDDWKATRVGINIFRLRTQKE                       | y25      |                |
| 986.3420     | 1466.3    | 5 | 986.3353       | -6.7        | RNGKEVLKTMWLLRSSVNDIGDDWKATRVGINIF<br>TRLRTQKE | y42      | NH3 loss       |
| 989.7440     | 27286.3   | 5 | 989.7406       | -3.4        | RNGKEVLKTMWLLRSSVNDIGDDWKATRVGINIF<br>TRLRTQKE | y42      |                |
| 989.7447     | 28554.2   | 5 | 989.7406       | -4.1        | RNGKEVLKTMWLLRSSVNDIGDDWKATRVGINIF<br>TRLRTQKE | y42      |                |
| 993.5626     | 5144.9    | 2 | 993.5658       | 3.2         | ATRVGINIFRLRTQKE                               | y17      | NH3 loss       |
| 1002.0782    | 4202.8    | 2 | 1002.0791      | 0.8         | ATRVGINIFRLRTQKE                               | y17      |                |
| 1013.5881    | 1644.7    | 1 | 1013.5851      | -3.0        | TRLRTQKE                                       | y8       | H2O loss       |
| 1015.8834    | 1959.1    | 3 | 1015.8791      | -4.2        | VNDIGDDWKATRVGINIFRLRTQKE                      | y26      |                |
| 1044.8885    | 3857.5    | 3 | 1044.8898      | 1.3         | SVNDIGDDWKATRVGINIFRLRTQKE                     | y27      |                |
| 1073.9016    | 9649.0    | 3 | 1073.9005      | -1.0        | SSVNDIGDDWKATRVGINIFRLRTQKE                    | y28      |                |

|           |          |   |           |      |                                                |     |                     |
|-----------|----------|---|-----------|------|------------------------------------------------|-----|---------------------|
| 1090.8537 | 4197.4   | 4 | 1090.8482 | -5.1 | VLKTMWLLRSSVNDIGDDWKATRVGINIFTRLRTQ<br>KE      | y37 |                     |
| 1120.2614 | 2062.0   | 3 | 1120.2587 | -2.5 | RSSVNDIGDDWKATRVGINIFTRLRTQKE                  | y29 | NH3 loss            |
| 1123.1134 | 1757.5   | 4 | 1123.1089 | -4.0 | EVLKTMWLLRSSVNDIGDDWKATRVGINIFTRLRT<br>QKE     | y38 |                     |
| 1150.1649 | 1920.6   | 2 | 1150.1609 | -3.4 | WKATRVGINIFTRLRTQKE                            | y19 | H2O loss            |
| 1150.6540 | 4931.7   | 2 | 1150.6529 | -0.9 | WKATRVGINIFTRLRTQKE                            | y19 | NH3 loss            |
| 1157.9599 | 2122.6   | 3 | 1157.9534 | -5.6 | LRSSVNDIGDDWKATRVGINIFTRLRTQKE                 | y30 | NH3 loss            |
| 1159.1652 | 64333.9  | 2 | 1159.1662 | 0.9  | WKATRVGINIFTRLRTQKE                            | y19 |                     |
| 1199.6634 | 4080.4   | 2 | 1199.6531 | -8.6 | DWKATRVGINIFTRLRTQKE                           | y20 | 2xNH3<br>loss       |
| 1207.6766 | 4882.6   | 2 | 1207.6744 | -1.8 | DWKATRVGINIFTRLRTQKE                           | y20 | H2O loss            |
| 1208.1707 | 16175.5  | 2 | 1208.1664 | -3.5 | DWKATRVGINIFTRLRTQKE                           | y20 | NH3 loss            |
| 1216.6796 | 217740.0 | 2 | 1216.6797 | 0.1  | DWKATRVGINIFTRLRTQKE                           | y20 |                     |
| 1236.9298 | 14185.5  | 4 | 1236.9240 | -4.7 | RNGKEVLKTMWLLRSSVNDIGDDWKATRVGINIF<br>TRLRTQKE | y42 |                     |
| 1256.6686 | 2299.4   | 2 | 1256.6746 | 4.8  | DDWKATRVGINIFTRLRTQKE                          | y21 | H2O and<br>NH3 loss |
| 1265.1884 | 2495.2   | 2 | 1265.1879 | -0.4 | DDWKATRVGINIFTRLRTQKE                          | y21 | H2O loss            |
| 1274.1971 | 3418.0   | 2 | 1274.1932 | -3.1 | DDWKATRVGINIFTRLRTQKE                          | y21 |                     |
| 1291.7488 | 4246.3   | 1 | 1291.7481 | -0.5 | IFTRLRTQKE                                     | y10 |                     |
| 1302.7136 | 2367.3   | 2 | 1302.7039 | -7.4 | GDDWKATRVGINIFTRLRTQKE                         | y22 |                     |
| 1346.7073 | 5396.5   | 1 | 1346.6998 | -5.6 | ARKCSLTGKWTN                                   | b12 |                     |
| 1350.2423 | 3258.9   | 2 | 1350.2406 | -1.3 | IGDDWKATRVGINIFTRLRTQKE                        | y23 | H2O loss            |
| 1359.2452 | 26576.5  | 2 | 1359.2459 | 0.5  | IGDDWKATRVGINIFTRLRTQKE                        | y23 |                     |
| 1388.7719 | 3584.0   | 1 | 1388.7645 | -5.3 | NIFTRLRTQKE                                    | y11 | NH3 loss            |
| 1407.7525 | 2390.4   | 2 | 1407.7541 | 1.1  | DIGDDWKATRVGINIFTRLRTQKE                       | y24 | H2O loss            |
| 1416.7602 | 9258.7   | 2 | 1416.7594 | -0.6 | DIGDDWKATRVGINIFTRLRTQKE                       | y24 |                     |
| 1461.7386 | 3698.7   | 1 | 1461.7267 | -8.1 | ARKCSLTGKWTND                                  | b13 |                     |
| 1465.2794 | 1795.3   | 2 | 1465.2676 | -8.1 | NDIGDDWKATRVGINIFTRLRTQKE                      | y25 | NH3 loss            |
| 1473.7716 | 1909.9   | 2 | 1473.7809 | 6.3  | NDIGDDWKATRVGINIFTRLRTQKE                      | y25 |                     |
|           |          |   |           |      |                                                |     |                     |

**Table S2:** Table of fragment identifications for TMP-modified Avidin. Output of a representative single analysis of TMP-modified Avidin is presented. Information for the detected feature, including m/z, peak intensity, and charge is shown along with the identified match, including sequence, ion type, error in parts per million (ppm), and any modifications. Modifications are not localized to a specific residue. Data presented in the main body of the paper contain at least three replicates similar to the data presented here. Mass accuracy of identified features is consistent across all sequencing data presented.

| Observed m/z | Intensity | Calculated m/z | Error (ppm) | Charge | Sequence             | Ion Type | Neutral Losses                       | Mods  |
|--------------|-----------|----------------|-------------|--------|----------------------|----------|--------------------------------------|-------|
| 460.3018     | 72667     | 460.3036       | 4.0         | 1      | ARK                  | b3       |                                      | TMP   |
| 508.2749     | 10406     | 508.2771       | 4.4         | 1      | QKE                  | y3       |                                      | TMP   |
| 517.8132     | 1686      | 517.8092       | -7.8        | 2      | RLRTQKE              | y7       |                                      | TMP   |
| 518.2854     | 2459      | 518.2868       | 2.7         | 1      | ARKCS                | a5       |                                      |       |
| 535.3173     | 166498    | 535.3179       | 1.0         | 1      | ARKC                 | a4       |                                      | TMP   |
| 591.3139     | 14384     | 591.3142       | 0.6         | 1      | TQKE                 | y4       | H <sub>2</sub> O                     | TMP   |
| 609.3249     | 8865      | 609.3248       | -0.1        | 1      | TQKE                 | y4       |                                      | TMP   |
| 614.3459     | 1301      | 614.3443       | -2.7        | 1      | ARKCSL               | a6       | NH <sub>3</sub>                      |       |
| 622.3487     | 6825      | 622.3499       | 1.9         | 1      | ARKCS                | a5       |                                      | TMP   |
| 631.3693     | 1016      | 631.3708       | 2.4         | 1      | ARKCSL               | a6       |                                      |       |
| 735.4367     | 4197      | 735.4340       | -3.7        | 1      | ARKCSL               | a6       |                                      | TMP   |
| 746.9185     | 6847      | 746.9174       | -1.3        | 2      | NIFTRLRTQKE          | y11      | NH <sub>3</sub>                      | TMP   |
| 755.4105     | 3471      | 755.4059       | -6.0        | 2      | ARKCSLTGKWTN         | a12      | NH <sub>3</sub>                      | 2xTMP |
| 760.4168     | 902       | 760.4134       | -4.4        | 1      | ARKCSLT              | b7       |                                      |       |
| 763.4360     | 1190      | 763.4289       | -9.3        | 1      | ARKCSL               | b6       |                                      | TMP   |
| 765.4265     | 4232      | 765.4259       | -0.8        | 1      | RTQKE                | y5       |                                      | TMP   |
| 774.4469     | 1970      | 774.4468       | -0.1        | 1      | LRTQKE               | y6       |                                      |       |
| 777.9180     | 48777     | 777.9167       | -1.7        | 2      | ARKCSLTGKWTN         | b12      |                                      | 2xTMP |
| 793.9047     | 7941      | 793.9090       | 5.5         | 2      | ARKCSLTGKWTNDLG      | a15      | NH <sub>3</sub>                      |       |
| 802.1246     | 1965      | 802.1254       | 1.1         | 3      | WKATRVGINIFTRLRTQKE  | y19      | NH <sub>3</sub>                      | TMP   |
| 807.8018     | 20064     | 807.8009       | -1.0        | 3      | WKATRVGINIFTRLRTQKE  | y19      |                                      | TMP   |
| 817.4417     | 1342      | 817.4349       | -8.4        | 1      | ARKCSLTG             | b8       |                                      |       |
| 819.4500     | 1234      | 819.4551       | 6.3         | 1      | ARKCSLT              | a7       | NH <sub>3</sub>                      | TMP   |
| 835.4317     | 19710     | 835.4301       | -1.9        | 2      | ARKCSLTGKWTND        | b13      |                                      | 2xTMP |
| 836.8197     | 3934      | 836.8131       | -7.8        | 3      | WKATRVGINIFTRLRTQKE  | y19      | NH <sub>3</sub>                      | 2xTMP |
| 840.4724     | 1645      | 840.4677       | -5.5        | 3      | DWKATRVGINIFTRLRTQKE | y20      | NH <sub>3</sub>                      | TMP   |
| 846.1473     | 7762      | 846.1433       | -4.8        | 3      | DWKATRVGINIFTRLRTQKE | y20      |                                      | TMP   |
| 851.4229     | 4625      | 851.4225       | -0.5        | 2      | ARKCSLTGKWTNDLGS     | b16      | NH <sub>3</sub>                      |       |
| 861.4760     | 854       | 861.4834       | 8.6         | 1      | LRTQKE               | y6       | NH <sub>3</sub>                      | TMP   |
| 869.1517     | 4076      | 869.1519       | 0.3         | 3      | DWKATRVGINIFTRLRTQKE | y20      | H <sub>2</sub> O,<br>NH <sub>3</sub> | 2xTMP |
| 874.8286     | 2901      | 874.8275       | -1.3        | 3      | DWKATRVGINIFTRLRTQKE | y20      | H <sub>2</sub> O                     | 2xTMP |
| 875.1609     | 9160      | 875.1555       | -6.2        | 3      | DWKATRVGINIFTRLRTQKE | y20      | NH <sub>3</sub>                      | 2xTMP |
| 878.5096     | 4140      | 878.5100       | 0.4         | 1      | LRTQKE               | y6       |                                      | TMP   |

|           |       |           |      |   |                                                 |     |                                            |       |
|-----------|-------|-----------|------|---|-------------------------------------------------|-----|--------------------------------------------|-------|
| 880.8302  | 48654 | 880.8310  | 0.9  | 3 | DWKATRVGINIFTRLRTQKE                            | y20 |                                            | 2xTMP |
| 907.4876  | 1044  | 907.4943  | 7.3  | 3 | DDWKATRVGINIFTRLRTQKE                           | y21 | H <sub>2</sub> O,<br>NH <sub>3</sub>       | 2xTMP |
| 913.5007  | 3367  | 913.4978  | -3.1 | 3 | DDWKATRVGINIFTRLRTQKE                           | y21 | NH <sub>3</sub>                            | 2xTMP |
| 930.5448  | 1374  | 930.5479  | 3.4  | 1 | RLRTQKE                                         | y7  |                                            |       |
| 941.1863  | 5826  | 941.1874  | 1.2  | 3 | IGDDWKATRVGINIFTRLRTQKE                         | y23 |                                            | TMP   |
| 969.8678  | 2059  | 969.8716  | 3.9  | 3 | IGDDWKATRVGINIFTRLRTQKE                         | y23 | H <sub>2</sub> O                           | 2xTMP |
| 975.8727  | 17062 | 975.8751  | 2.5  | 3 | IGDDWKATRVGINIFTRLRTQKE                         | y23 |                                            | 2xTMP |
| 1002.5460 | 1328  | 1002.5384 | -7.6 | 3 | DIGDDWKATRVGINIFTRLRTQKE                        | y24 | H <sub>2</sub> O<br>and<br>NH <sub>3</sub> | 2xTMP |
| 1008.2047 | 1151  | 1008.2139 | 9.1  | 3 | DIGDDWKATRVGINIFTRLRTQKE                        | y24 | H <sub>2</sub> O                           | 2xTMP |
| 1013.5892 | 1055  | 1013.5851 | -4.1 | 1 | TRLRTQKE                                        | y8  | H <sub>2</sub> O                           |       |
| 1014.2164 | 5243  | 1014.2175 | 1.0  | 3 | DIGDDWKATRVGINIFTRLRTQKE                        | y24 |                                            | 2xTMP |
| 1018.9571 | 1296  | 1018.9624 | 5.2  | 5 | GKEVLKTMWLLRSSVNDIGDDWKA<br>TRVGINIFTRLRTQKE    | y40 |                                            | 4xTMP |
| 1034.6190 | 3209  | 1034.6111 | -7.6 | 1 | RLRTQKE                                         | y7  |                                            | TMP   |
| 1046.1869 | 1136  | 1046.1869 | 0.0  | 3 | ARKCLTGKWTNDLGSNMTIGAVN<br>SRGEF                | a29 | H <sub>2</sub> O,<br>NH <sub>3</sub>       | TMP   |
| 1047.3660 | 1745  | 1047.3639 | -2.0 | 5 | DRNGKEVLKTMWLLRSSVNDIGDD<br>WKATRVGINIFTRLRTQKE | y43 | H <sub>2</sub> O,<br>NH <sub>3</sub>       | 2xTMP |
| 1048.5677 | 1386  | 1048.5764 | 8.3  | 5 | RNGKEVLKTMWLLRSSVNDIGDDW<br>KATRVGINIFTRLRTQKE  | y42 | H <sub>2</sub> O                           | 3xTMP |
| 1072.9928 | 8004  | 1072.9912 | -1.5 | 5 | RNGKEVLKTMWLLRSSVNDIGDDW<br>KATRVGINIFTRLRTQKE  | y42 |                                            | 4xTMP |
| 1085.2468 | 1009  | 1085.2546 | 7.2  | 3 | VNDIGDDWKATRVGINIFTRLRTQK<br>E                  | y26 |                                            | 2xTMP |
| 1117.6497 | 1988  | 1117.6482 | -1.3 | 1 | TRLRTQKE                                        | y8  | H <sub>2</sub> O                           | TMP   |
| 1143.2652 | 1200  | 1143.2759 | 9.3  | 3 | SSVNDIGDDWKATRVGINIFTRLRT<br>QKE                | y28 |                                            | 2xTMP |
| 1202.6781 | 3787  | 1202.6845 | 5.3  | 2 | WKATRVGINIFTRLRTQKE                             | y19 | NH <sub>3</sub>                            | TMP   |
| 1211.1932 | 16059 | 1211.1978 | 3.8  | 2 | WKATRVGINIFTRLRTQKE                             | y19 |                                            | TMP   |
| 1251.1917 | 14023 | 1251.1927 | 0.8  | 2 | DWKATRVGINIFTRLRTQKE                            | y20 | H <sub>2</sub> O,<br>NH <sub>3</sub>       | TMP   |
| 1258.6901 | 1158  | 1258.6831 | -5.5 | 4 | RNGKEVLKTMWLLRSSVNDIGDDW<br>KATRVGINIFTRLRTQKE  | y42 | NH <sub>3</sub>                            | TMP   |
| 1260.1994 | 24177 | 1260.1980 | -1.1 | 2 | DWKATRVGINIFTRLRTQKE                            | y20 | NH <sub>3</sub>                            | TMP   |
| 1263.2265 | 32408 | 1263.2294 | 2.3  | 2 | WKATRVGINIFTRLRTQKE                             | y19 |                                            | 2xTMP |
| 1268.7108 | 54856 | 1268.7113 | 0.4  | 2 | DWKATRVGINIFTRLRTQKE                            | y20 |                                            | TMP   |
| 1269.2047 | 2347  | 1269.1945 | -8.0 | 4 | GKEVLKTMWLLRSSVNDIGDDWKA<br>TRVGINIFTRLRTQKE    | y40 | NH <sub>3</sub>                            | 4xTMP |
| 1273.4495 | 3581  | 1273.4511 | 1.3  | 4 | GKEVLKTMWLLRSSVNDIGDDWKA<br>TRVGINIFTRLRTQKE    | y40 |                                            | 4xTMP |
| 1288.9575 | 1875  | 1288.9556 | -1.5 | 4 | RNGKEVLKTMWLLRSSVNDIGDDW<br>KATRVGINIFTRLRTQKE  | y42 |                                            | 2xTMP |
| 1291.7547 | 1318  | 1291.7481 | -5.1 | 1 | IFTRLRTQKE                                      | y10 |                                            |       |
| 1293.1997 | 1055  | 1293.2026 | 2.2  | 4 | NGKEVLKTMWLLRSSVNDIGDDWK<br>ATRVGINIFTRLRTQKE   | y41 | H <sub>2</sub> O,<br>NH <sub>3</sub>       | 4xTMP |

|           |        |           |      |   |                                                  |     |                                      |       |
|-----------|--------|-----------|------|---|--------------------------------------------------|-----|--------------------------------------|-------|
| 1301.9529 | 1328   | 1301.9619 | 6.9  | 4 | NGKEVLKTMWLLRSSVNDIGDDWK<br>ATRVGINIFRLRTQKE     | y41 |                                      | 4xTMP |
| 1303.2217 | 40609  | 1303.2243 | 1.9  | 2 | DWKATRVGINIFRLRTQKE                              | y20 | H <sub>2</sub> O,<br>NH <sub>3</sub> | 2xTMP |
| 1308.7085 | 3375   | 1308.7062 | -1.8 | 2 | DDWKATRVGINIFRLRTQKE                             | y21 | H <sub>2</sub> O,<br>NH <sub>3</sub> | TMP   |
| 1310.7185 | 4032   | 1310.7147 | -2.9 | 4 | RNGKEVLKTMWLLRSSVNDIGDDW<br>KATRVGINIFRLRTQKE    | y42 | NH <sub>3</sub>                      | 3xTMP |
| 1311.7354 | 14221  | 1311.7375 | 1.6  | 2 | DWKATRVGINIFRLRTQKE                              | y20 | H <sub>2</sub> O                     | 2xTMP |
| 1312.2320 | 48925  | 1312.2296 | -1.9 | 2 | DWKATRVGINIFRLRTQKE                              | y20 | NH <sub>3</sub>                      | 2xTMP |
| 1314.9802 | 5520   | 1314.9713 | -6.7 | 4 | RNGKEVLKTMWLLRSSVNDIGDDW<br>KATRVGINIFRLRTQKE    | y42 |                                      | 3xTMP |
| 1317.7207 | 4651   | 1317.7115 | -7.0 | 2 | DDWKATRVGINIFRLRTQKE                             | y21 | NH <sub>3</sub>                      | TMP   |
| 1320.7420 | 127863 | 1320.7428 | 0.6  | 2 | DWKATRVGINIFRLRTQKE                              | y20 |                                      | 2xTMP |
| 1336.4779 | 2953   | 1336.4845 | 4.9  | 4 | RNGKEVLKTMWLLRSSVNDIGDDW<br>KATRVGINIFRLRTQKE    | y42 | H <sub>2</sub> O                     | 4xTMP |
| 1339.4632 | 1229   | 1339.4714 | 6.2  | 4 | DRNGKEVLKTMWLLRSSVNDIGDD<br>WKATRVGINIFRLRTQKE   | y43 | NH <sub>3</sub>                      | 3xTMP |
| 1356.7329 | 1000   | 1356.7346 | 1.3  | 4 | FIDRNGKEVLKTMWLLRSSVNDIGD<br>DWKATRVGINIFRLRTQKE | y45 |                                      | TMP   |
| 1365.4821 | 1021   | 1365.4872 | 3.8  | 4 | DRNGKEVLKTMWLLRSSVNDIGDD<br>WKATRVGINIFRLRTQKE   | y43 | NH <sub>3</sub>                      | 4xTMP |
| 1369.2467 | 3626   | 1369.2510 | 3.1  | 2 | DDWKATRVGINIFRLRTQKE                             | y21 | H <sub>2</sub> O                     | 2xTMP |
| 1378.2593 | 3582   | 1378.2563 | -2.2 | 2 | DDWKATRVGINIFRLRTQKE                             | y21 |                                      | 2xTMP |
| 1388.7740 | 3768   | 1388.7645 | -6.8 | 1 | NIFRLRTQKE                                       | y11 | NH <sub>3</sub>                      |       |
| 1395.8150 | 2525   | 1395.8112 | -2.7 | 1 | IFRLRTQKE                                        | y10 |                                      | TMP   |
| 1411.2703 | 5956   | 1411.2775 | 5.1  | 2 | IGDDWKATRVGINIFRLRTQKE                           | y23 |                                      | TMP   |
| 1454.2943 | 3369   | 1454.3038 | 6.5  | 2 | IGDDWKATRVGINIFRLRTQKE                           | y23 | H <sub>2</sub> O                     | 2xTMP |
| 1460.2875 | 4160   | 1460.2777 | -6.7 | 2 | DIGDDWKATRVGINIFRLRTQKE                          | y24 | NH <sub>3</sub>                      | TMP   |
| 1463.3062 | 9844   | 1463.3091 | 1.9  | 2 | IGDDWKATRVGINIFRLRTQKE                           | y23 |                                      | 2xTMP |
| 1468.7838 | 4196   | 1468.7910 | 4.9  | 2 | DIGDDWKATRVGINIFRLRTQKE                          | y24 |                                      | TMP   |
| 1511.8054 | 6439   | 1511.8173 | 7.9  | 2 | DIGDDWKATRVGINIFRLRTQKE                          | y24 | H <sub>2</sub> O                     | 2xTMP |
| 1520.8195 | 12791  | 1520.8225 | 2.0  | 2 | DIGDDWKATRVGINIFRLRTQKE                          | y24 |                                      | 2xTMP |
| 1554.8368 | 3229   | 1554.8261 | -6.9 | 1 | ARKCSLTGKWTN                                     | b12 |                                      | 2xTMP |
| 1565.8048 | 1389   | 1565.7899 | -9.5 | 1 | ARKCSLTGKWTND                                    | b13 |                                      | TMP   |

#### References:

- (1) Samulak, B. M.; Niu, S.; Andrews, P. C.; Ruotolo, B. T. *Anal. Chem.* **2016**, *88*, 5290–5298.
